# Supplementary material for: Amphiphilic cationic copolymers with ciprofloxacin: preparation and antimicrobial activities
Source: Royal Society of Chemistry journal article supplement (doi:10.1039/c5nj02145f), 2015-11-27
Supplement: c5nj02145f1.pdf [file c5nj02145f1.pdf]

**New Journal of Chemistry**

## **Supplementary Information**

### **Amphiphilic Cationic Copolymers with Ciprofloxacin:**

### **Preparation and Antimicrobial Activities**

**Man He,<sup>a,b,c</sup> Yuming Zhou,<sup>\*a,c</sup> Huining Xiao<sup>\*b</sup> and Peng Lu<sup>b</sup>**

<sup>a</sup> School of Chemistry and Chemical Engineering, Southeast University, Nanjing  
211189, China

<sup>b</sup> Department of Chemical Engineering & Limerick Pulp and Paper Centre, University  
of New Brunswick, Fredericton, NB E3B 5A3, Canada

<sup>c</sup> Jiangsu Optoelectronic Functional Materials and Engineering Laboratory, Nanjing  
211189, China

\*Correspondence to: Y. Zhou (E-mail: fchem@seu.edu.cn); H. Xiao (E-mail:  
hxiao@unb.ca)

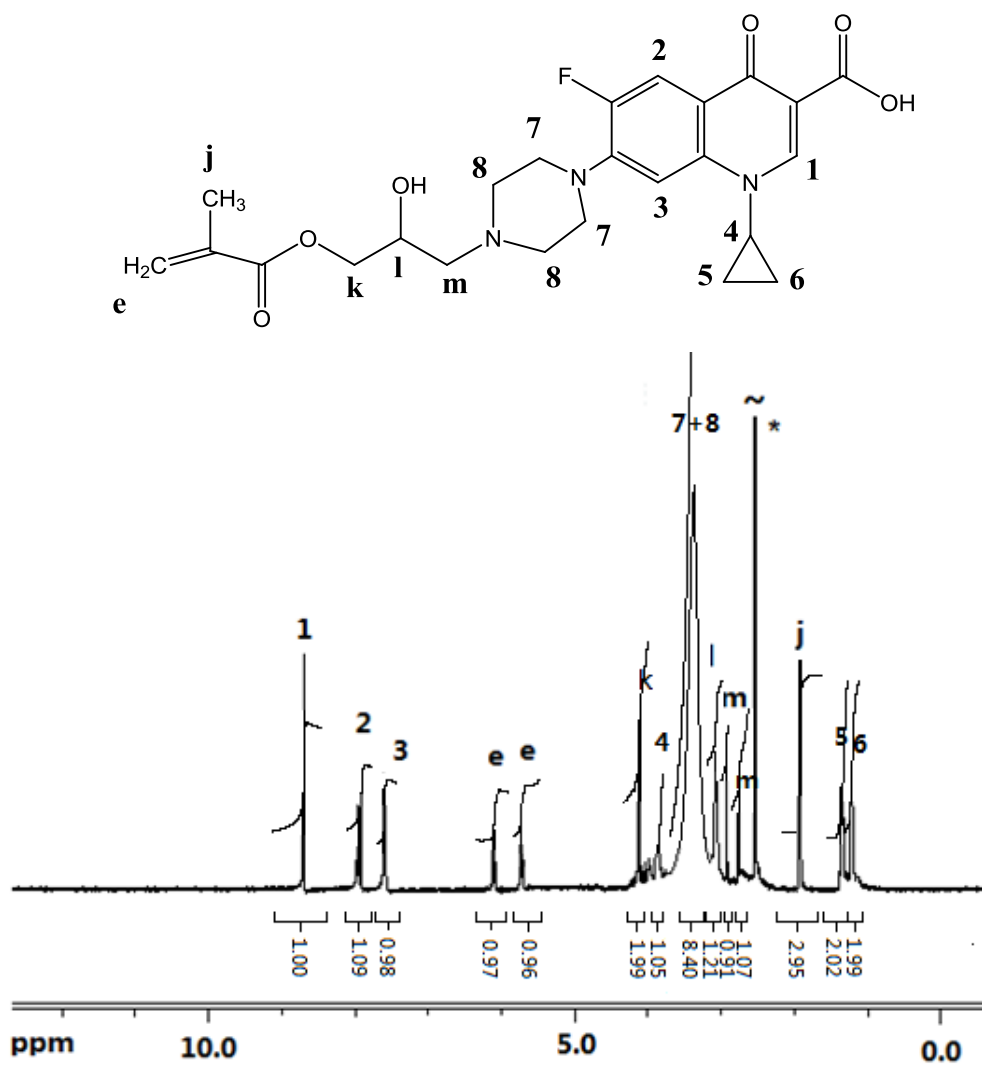

Figure S1. <sup>1</sup>H-NMR spectrum of GMA-CPF in DMSO-d<sub>6</sub>

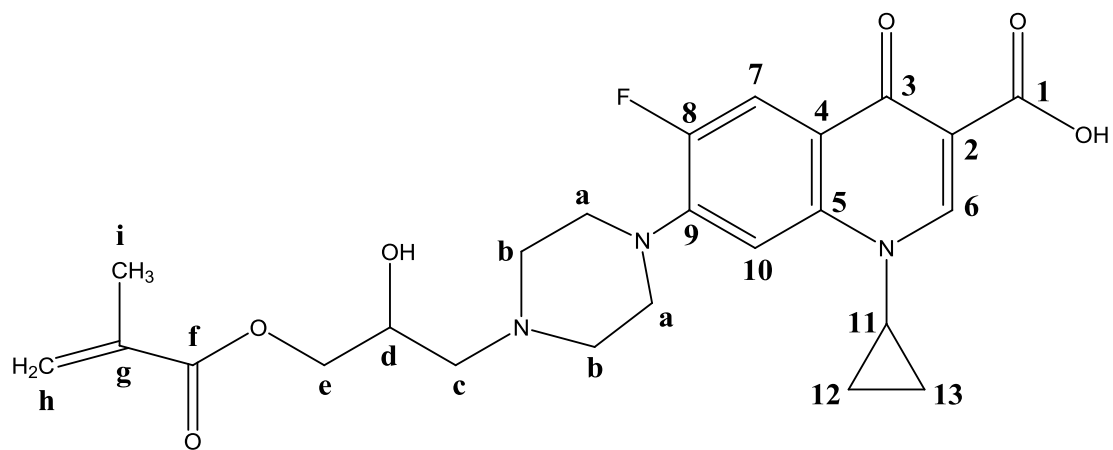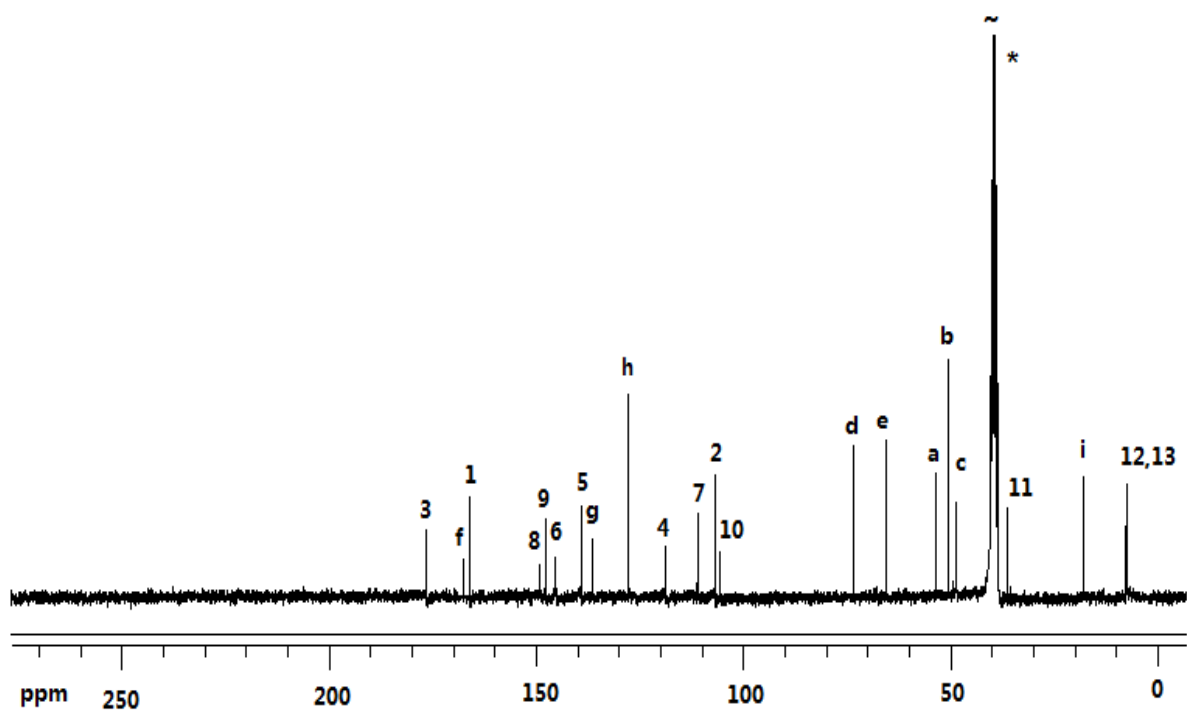

Figure S2.  $^{13}\text{C}$ -NMR spectrum of GMA-CPF

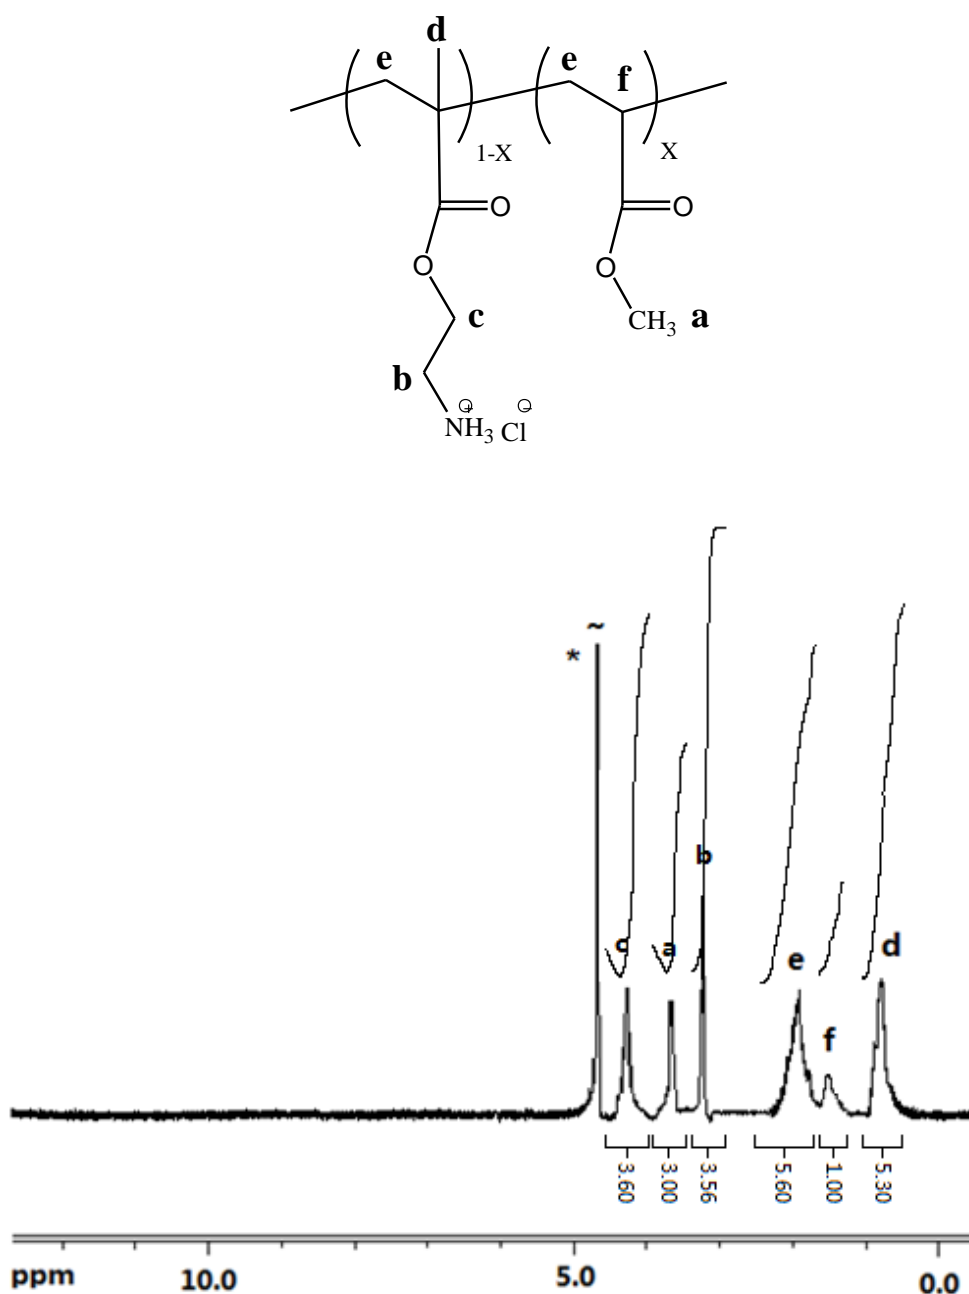

Figure S3. <sup>1</sup>H-NMR spectrum of AEMA/MA copolymer in DMSO-d<sub>6</sub>;  
(1-x): x=64: 36

The copolymer compositions for this system were determined by <sup>1</sup>H-NMR spectroscopy analysis. The <sup>1</sup>H-NMR peak at 3.65 ppm (Figure S3, a) corresponds to the methyl group of MA side chain; the peak at 3.27 ppm (Figure S3, b) corresponds to the methylene group, -O-CH<sub>2</sub>-CH<sub>2</sub>-NH<sub>3</sub><sup>+</sup>Cl<sup>-</sup>, in the AEMA side chain. Let  $m_1$  be the mole fraction of AEMA and  $m_2 = (1-m_1)$  that of the MA unit.

$$\frac{Area_{3.65ppm}}{Area_{3.27ppm}} = \frac{3m_2}{2m_1} = C_1 \quad \text{Equation 1a}$$

Where  $\text{Area}_{3.65\text{ppm}}$ =area of the peak at 3.65ppm and  $\text{Area}_{3.27\text{ppm}}$ =area of the peak at 3.27ppm.

On simplification,

$$m_1 = \frac{3}{2C_1+3} \quad \text{Equation 1b}$$

Where  $m_1$  and  $m_2$  are the copolymer molar compositions. The results are presented in Table 1, which are in agreement with the values calculated by apparent charge density.

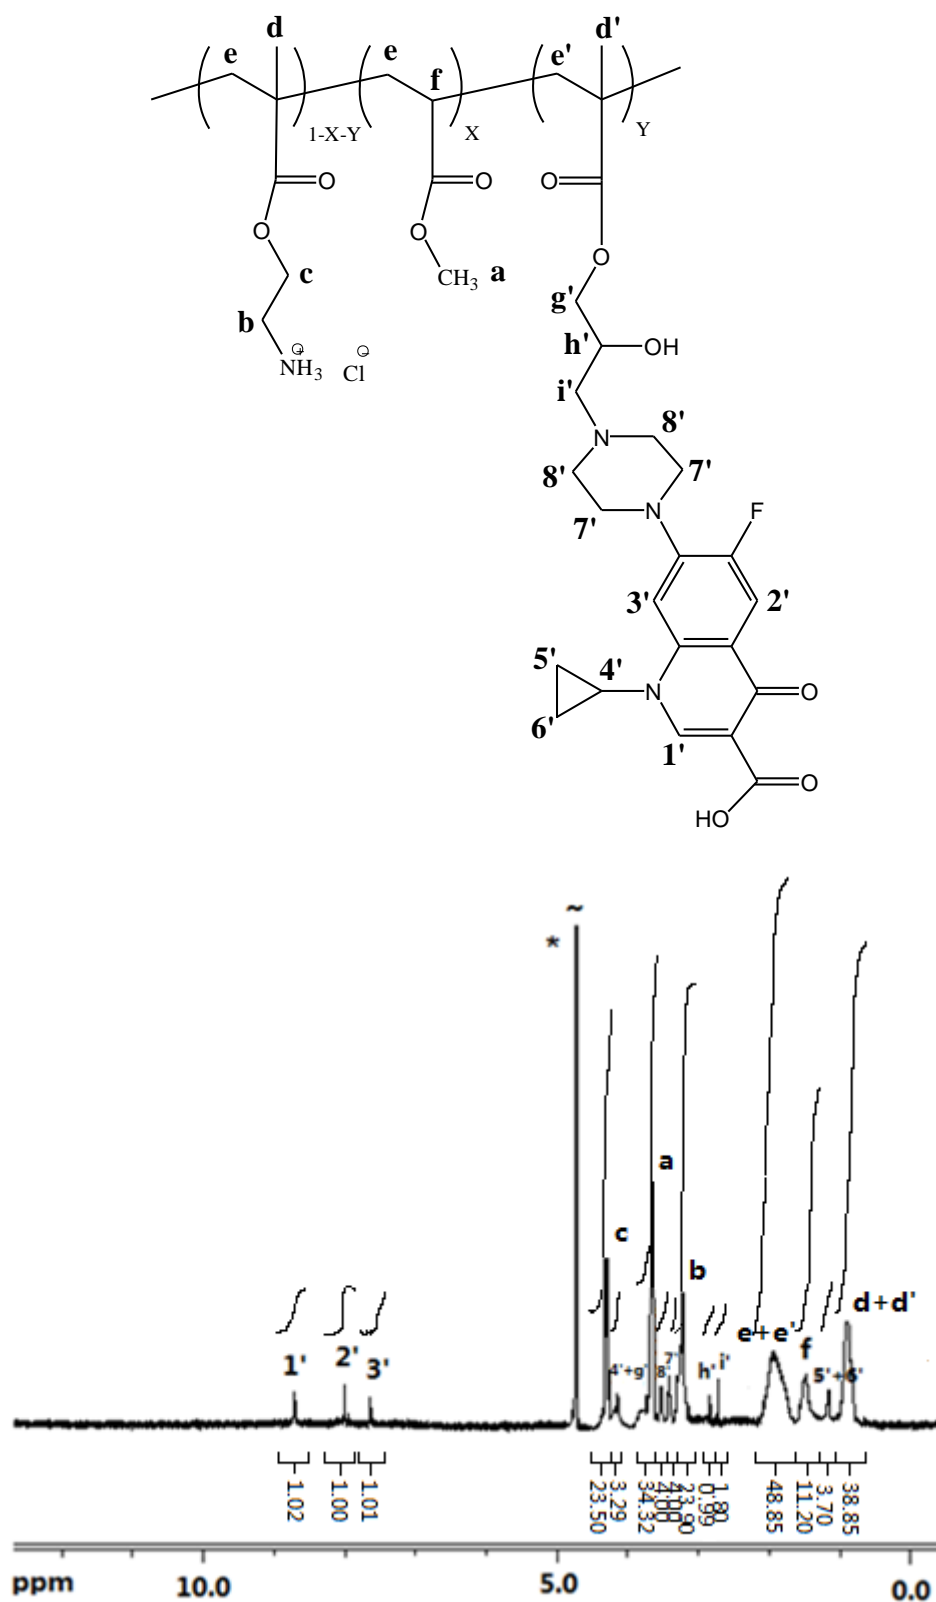

Figure S4. <sup>1</sup>H-NMR spectrum of AEMAH/MA/GMA-CPF copolymer in DMSO-d<sub>6</sub>; (1-x-y): x: y=49: 46.9: 4.1

The copolymer compositions for this system were determined by <sup>1</sup>H-NMR

spectroscopy analysis. The  $^1\text{H-NMR}$  peak at 3.65 ppm (Figure S4, a) corresponds to the methyl group of MA side chain; the peak at 3.27 ppm (Figure S4, b) corresponds to the methylene group,  $-\text{O-CH}_2\text{-CH}_2\text{-NH}_3^+\text{Cl}^-$ , in the AEMAH side chain; the peaks at 0.81 ppm (Figure S4, d+d') are the methyl group for AEMAH and GMA-CPF. Considering the mole fraction of AEMAH as  $m_1$ , the mole fraction of MA as  $m_2$ , and  $m_3 = (1-m_1-m_2)$  that of the GMA-CPF unit.

$$\frac{\text{Area}_{3.65\text{ppm}}}{\text{Area}_{3.27\text{ppm}}} = \frac{3m_2}{2m_1} = C_1 \quad \text{Equation 2a}$$

$$\frac{\text{Area}_{3.27\text{ppm}}}{\text{Area}_{0.81\text{ppm}}} = \frac{2m_1}{3m_1+3m_3} = C_2 \quad \text{Equation 2b}$$

Where  $\text{Area}_{3.65\text{ppm}}$ =area of the peak at 3.65ppm,  $\text{Area}_{3.27\text{ppm}}$ =area of the peak at 3.27ppm, and  $\text{Area}_{0.81\text{ppm}}$ =area of the peak at 0.81ppm.

On simplification,

$$m_1 = \frac{3C_2}{2C_1C_2+2} \quad \text{Equation 2c}$$

$$m_2 = \frac{C_1C_2}{C_1C_2+1} \quad \text{Equation 2d}$$

$$m_3 = \frac{2-3C_2}{2C_1C_2+2} \quad \text{Equation 2e}$$

Where  $m_1$ ,  $m_2$ , and  $m_3$  are the copolymer molar compositions. The results are presented in Table 1, which are in agreement with the values calculated by apparent charge density and UV measurements.
